# Supplementary material
Source: PubMed Central journal article supplement (PMC7311064)
Supplement: NIHMS1596529-supplement-Supplementary_Table_S1.pdf [file NIHMS1596529-supplement-Supplementary_Table_S1.pdf]

**Supplementary Table S1**—Longevity data by body weight classification for 2,562 dogs in England that survived to adulthood and were included in a records-based longevity study reported elsewhere.<sup>26</sup>

| Body weight (kg) | No. of dogs | Lifespan (y) |         |                                              |        |                                              |         |
|------------------|-------------|--------------|---------|----------------------------------------------|--------|----------------------------------------------|---------|
|                  |             | Mean ± SD    | Minimum | Lower quartile (25 <sup>th</sup> percentile) | Median | Upper quartile (75 <sup>th</sup> percentile) | Maximum |
| 0–9.99           | 604         | 11.96 ± 4.04 | 1.01    | 9.81                                         | 12.67  | 14.89                                        | 23      |
| 10–19.99         | 676         | 11.85 ± 3.59 | 1       | 10                                           | 12.49  | 14.28                                        | 21.62   |
| 20–29.99         | 596         | 11.45 ± 3.48 | 1.07    | 9.8                                          | 12.34  | 13.87                                        | 20.33   |
| 30–39.99         | 437         | 10.72 ± 3.03 | 1.12    | 9.01                                         | 11.27  | 12.89                                        | 16.36   |
| 40–49.99         | 168         | 9.83 ± 2.72  | 2.69    | 8.06                                         | 10.03  | 11.67                                        | 17.59   |
| ≥ 50             | 81          | 8.04 ± 2.91  | 2.22    | 5.92                                         | 8      | 10.07                                        | 16.55   |

Dogs < 1 year of age at the time of death had not achieved full adult body weight and were excluded. Upper and lower quartiles in the table represent 75<sup>th</sup> and 25<sup>th</sup> percentiles, respectively. Original data provided by personal communication from DG O'Neill. These data were used to determine the quartile of projected percentage of weight-based life expectancy attained for the 57 adult dogs in the present study.
